# Supplementary material for: Two-dimensional exciton properties in monolayer semiconducting phosphorus allotropes
Source: Royal Society of Chemistry journal article supplement (doi:10.1039/c6cp05566d), 2016-01-01
Supplement: c6cp05566d1.pdf [file c6cp05566d1.pdf]

**Supporting information for:**  
**Two-dimensional exciton states in monolayer semiconducting  
phosphorus allotropes**

Cesar E. P. Villegas,<sup>1,2</sup> A. S. Rodin,<sup>3</sup> A. C. Carvalho,<sup>3</sup> and A.R. Rocha<sup>2</sup>

<sup>1</sup>*Istituto di Struttura della Materia of the National Research Council,*

*Via Salaria Km 29.3,I-00016 Monterotondo Stazione, Italy.*

<sup>2</sup>*Instituto de Física Teórica, Universidade Estadual Paulista (UNESP),*

*Rua Dr. Bento T. Ferraz, 271, São Paulo, SP 01140-070, Brazil.*

<sup>3</sup>*Centre for Advanced 2D Materials and Graphene Research Centre,*

*National University of Singapore, 6 Science Drive 2, Singapore 117546, Singapore*

## I. STRUCTURAL PARAMETERS

The relaxed lattice parameters and atomic coordinates, in Bohr units, for blue and black phosphorus are presented. For the reproducibility of our results the reader should consider an atomic mass of 30.97 and the pseudo-potential P.pbe-hgh.UPF, available in the Quantum-Espresso project webpage [1].

### A. Blue Phosphorene

Cell Parameters:

|       |       |       |        |
|-------|-------|-------|--------|
| $a_1$ | 6.181 | 0.000 | 0.000  |
| $a_2$ | 3.091 | 5.353 | 0.0000 |
| $a_3$ | 0.000 | 0.000 | 37.201 |

Atomic Positions:

|     |              |              |               |
|-----|--------------|--------------|---------------|
| $P$ | 6.1811406168 | 3.5686831906 | 20.9403459486 |
| $P$ | 3.0905703084 | 1.7843415984 | 18.6006200000 |

### B. Black Phosphorene

Cell Parameters:

|       |       |       |        |
|-------|-------|-------|--------|
| $a_1$ | 8.628 | 0.000 | 0.000  |
| $a_2$ | 0.000 | 6.243 | 0.000  |
| $a_3$ | 0.000 | 0.000 | 51.930 |

Atomic Positions:

|     |              |              |               |
|-----|--------------|--------------|---------------|
| $P$ | 0.0010552522 | 0.0000356586 | 29.9470289674 |
| $P$ | 2.8030439932 | 3.1217420556 | 29.9470395784 |
| $P$ | 4.3153452296 | 3.1217421076 | 25.9662853800 |
| $P$ | 7.1173323694 | 0.0000357105 | 25.9662777203 |

## II. SUBSTRATE EFFECTS

Performing accurate GW-BSE simulations of the phosphorus allotropes taking into consideration the underlying substrate can result computationally expensive or even prohibitive. Nevertheless, the proposed simplified models result useful in order to assess such effects. In the main text we define the effective dielectric constant  $\kappa$  in equation (7). For the monolayer in vacuum  $\kappa = 1$  as we considered through the work, but it is also possible to include the effects of a substrate by considering

$$\kappa = \frac{(\epsilon_1 + \epsilon_2)}{2} = \frac{(1 + \epsilon_{sub})}{2}, \quad (1)$$

where  $\epsilon_1 = 1$  and  $\epsilon_2 = \epsilon_{sub}$  represent the dielectric constant of the two media: vacuum and substrate, respectively.

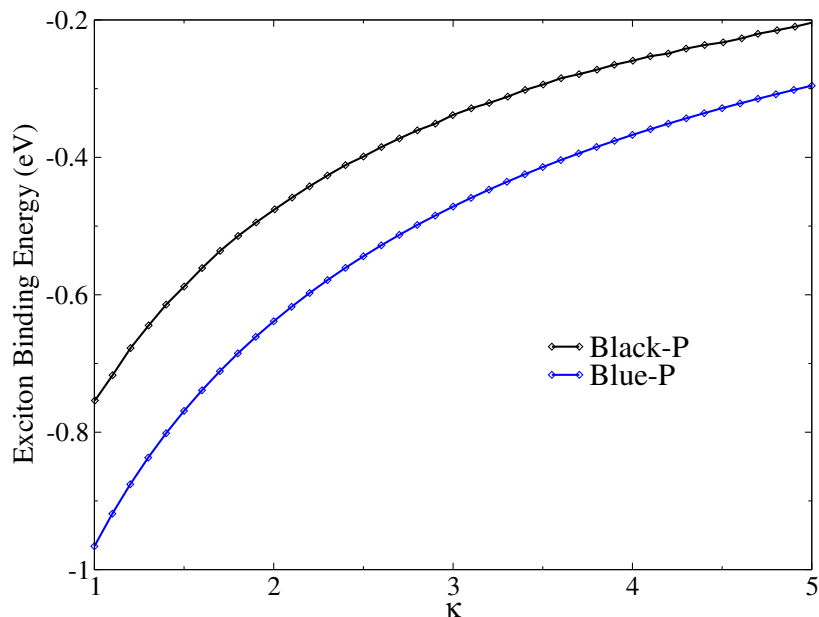

FIG. S1. Exciton binding energy as a function of the effective dielectric constant for blue and black phosphorus allotropes.

In Fig. (S1) we present the binding energy of blue and black Phosphorene as a function of the effective dielectric constant. In the figure, we observe that the absolute values of the binding energy for both, blue and black phosphorene, decreases as the dielectric constant increases. The reduction of the binding energy is expected since the effect of the dielectric

is to gradually enhance the screening of the system. Notice that for  $\kappa = 1$ , the free standing case studied in the main manuscript, the binding energies provide values of 0.96 and 0.75 for blue and black, respectively.

If we consider, for instance, the phosphorus allotropes deposited on  $SiO_2$ , for which  $\kappa \approx 2.45$ , our model predicts a binding energy for the first excitonic peak of 0.4 and 0.56 eV for black and blue phosphorus, respectively. Note that the predicted exciton binding energy of Black phosphorus on top of  $SiO_2$  is in good agreement with the measured value of 0.38 eV [2].

Finally, we can also predict the exciton binding energy of phosphorene on  $Au$  - the substrate on which blue phosphorene was recently obtained [3]. Thus, considering  $\epsilon_{Au} = 6.9$  ( $\kappa \approx 4$ ) for nanometer thick Gold [4], the binding energies for black and blue phosphorene are 0.26 and 0.368 eV, respectively.

---

## REFERENCES

- [1] Quantum Espresso, <http://www.quantum-espresso.org/pseudopotentials/> .
- [2] J. L. Zhang, S. Zhao, C. Han, Z. Wang, S. Zhong, S. Sun, R. Guo, X. Zhou, C. D. Gu, K. D. Yuan, Z. Li and W. Chen, *Nano Lett.*, 2016, **16**, 4903–4908.
- [3] A. Castellanos-Gomez, L. Vicarelli, E. Prada, J. O. Island, K. L. Narasimha-Acharya, S. I. Blanter, D. J. Groenendijk, M. Buscema, G. A. Steele, J. V. Alvarez, H. W. Zandbergen, J. J. Palacios and H. S. J. van der Zant, *2D Mater.*, 2014, **1**, 025001.
- [4] X. Wang, K.-P. Chen, M. Zhao, and D. D. Nolte, *Optics Express*. 2010, **10**, 24859-24867.
